# Supplementary material for: The Viral Oncoprotein LMP1 Exploits TRADD for Signaling by Masking Its Apoptotic Activity
Source: PLOS journal article supplement (doi:10.1371/journal.pbio.0060008), 2008-01-03
Supplement: S1 (10.1371/journal.pbio.0060008.s001) [file journal.pbio.0060008.s001]

**Table S1**

| cell line                     | DG75                    |                                                   | BJAB                    |                                                   | BL2                     |                                                   |
|-------------------------------|-------------------------|---------------------------------------------------|-------------------------|---------------------------------------------------|-------------------------|---------------------------------------------------|
|                               | number of clones tested | clones with successful targeting or recombination | number of clones tested | clones with successful targeting or recombination | number of clones tested | clones with successful targeting or recombination |
| gene targeting, first allele  | 145 <sup>a</sup>        | 2                                                 | 204 <sup>a</sup>        | 0 <sup>c</sup>                                    | 0 <sup>d</sup>          | n.a.                                              |
| Cre-recomb., first allele     | 27 <sup>b</sup>         | 27                                                | n.a.                    | n.a.                                              | n.a.                    | n.a.                                              |
| gene targeting, second allele | 108 <sup>a</sup>        | 2                                                 | n.a.                    | n.a.                                              | n.a.                    | n.a.                                              |
| Cre-recomb., second allele    | 10 <sup>b</sup>         | 7                                                 | n.a.                    | n.a.                                              | n.a.                    | n.a.                                              |

**Table S1.** Quantitative Results of the *TRADD* Gene Targeting in the EBV-negative B-cell Lines DG75, BJAB and BL2.

- a, After each gene targeting round, GFP-expressing and hygromycin B/ganciclovir-resistant clones were tested for successful homologous recombination at the *TRADD* locus by Southern blot analysis.
- b, After Cre-reaction, GFP-negative clones were tested for successful deletion of the GFP/hygromycin B cassette from the targeted allele by Southern blot analysis.
- c, None of the tested GFP-expressing and hygromycin B/ganciclovir-resistant clones in BJAB cells carried a targeted *TRADD* allele.
- d, No GFP-expressing and hygromycin B/ganciclovir-resistant clones were found despite repeated attempts under varied experimental conditions.

n.a., not applicable.
